# Supplementary material
Source: PubMed Central journal article supplement (PMC7963604)
Supplement: 17-00196.pdf [file 17-00196.pdf]

**On-line Table: Summary of demographic, clinical, and MR imaging findings of patients with presumed MVNT**

| Pt. No. | Age (yr) | Sex    | Clinical Manifestation                                  | EEG                 | Location               | Change during Follow-Up Period (mo) | Mass Effect | Signal Intensity on T1WI (Compared with Cortex) | Signal Intensity on T2WI (Compared with Normal White Matter) | Signal Intensity on FLAIR (Compared with CSF) | Signal Intensity on Thin-T2WI (Compared with CSF) | Signal Intensity on DWI (Compared with Normal White Matter) | Evidence of Restricted Diffusion | Presence of Gd Enhancement | SWI/GRE Blooming | Presence of Cortical Malformations or Abnormally Thick Overlying Cortex | Bubble-Like Lesion Size (Average Size in Millimeters) | Presence of Abnormal White Matter Signal Surrounding the Bubble-Like Lesions | Pathology Result                 |
|---------|----------|--------|---------------------------------------------------------|---------------------|------------------------|-------------------------------------|-------------|-------------------------------------------------|--------------------------------------------------------------|-----------------------------------------------|---------------------------------------------------|-------------------------------------------------------------|----------------------------------|----------------------------|------------------|-------------------------------------------------------------------------|-------------------------------------------------------|------------------------------------------------------------------------------|----------------------------------|
| 1       | 47       | Female | Headache                                                | X                   | Left temporoparietal   | 60                                  | No          | Iso                                             | High                                                         | High                                          | Low                                               | High                                                        | No                               | No                         | No               | No                                                                      | 1.0-3.0                                               | Yes                                                                          | X                                |
| 2       | 55       | Male   | Headache                                                | X                   | Right parietal         | 27                                  | No          | Iso                                             | High                                                         | High                                          | Low                                               | High                                                        | No                               | No                         | No               | No                                                                      | 2.0-5.0                                               | No                                                                           | X                                |
| 3       | 28       | Female | Seizures                                                | Generalized slowing | Right frontal          | 26                                  | No          | Iso                                             | High                                                         | High                                          | Low                                               | High                                                        | No                               | No                         | No               | No                                                                      | 1.0-3.0                                               | No                                                                           | X                                |
| 4       | 58       | Male   | Seizures                                                | Generalized slowing | Right temporoparietal  | 58                                  | No          | Iso                                             | High                                                         | High                                          | Low                                               | High                                                        | No                               | No                         | No               | No                                                                      | 1.0-3.0                                               | No                                                                           | X                                |
| 5       | 16       | Female | Headache                                                | X                   | Left frontoparietal    | 24                                  | No          | Iso                                             | High                                                         | High                                          | Low                                               | High                                                        | No                               | No                         | No               | No                                                                      | 1.0-2.0                                               | Yes                                                                          | X                                |
| 6       | 34       | Female | Upper extremity weakness                                | X                   | Left parietal          | 24                                  | No          | Iso                                             | High                                                         | High                                          | Low                                               | High                                                        | No                               | No                         | No               | No                                                                      | 1.0-3.0                                               | Yes                                                                          | X                                |
| 7       | 32       | Female | Headache                                                | X                   | Left parietal          | 30                                  | No          | Iso                                             | High                                                         | High                                          | Low                                               | High                                                        | No                               | No                         | No               | No                                                                      | 1.0-5.0                                               | No                                                                           | X                                |
| 8       | 41       | Male   | Headache                                                | X                   | Left temporoparietal   | 24                                  | No          | Iso                                             | High                                                         | High                                          | Low                                               | High                                                        | No                               | No                         | No               | No                                                                      | 1.0-3.0                                               | Yes                                                                          | X                                |
| 9       | 31       | Female | Seizures                                                | Generalized slowing | Left temporoparietal   | 36                                  | No          | Iso                                             | High                                                         | High                                          | Low                                               | High                                                        | No                               | No                         | No               | No                                                                      | 1.0-3.0                                               | No                                                                           | X                                |
| 10      | 15       | Female | Psychogenic                                             | X                   | Right occipital        | X                                   | No          | Iso                                             | High                                                         | High                                          | Low                                               | X                                                           | X                                | No                         | No               | No                                                                      | 1.0-3.0                                               | Yes                                                                          | Multiple glioneuronal hamartomas |
| 11      | 54       | Male   | Suspected right middle cerebral artery stroke           | X                   | Left parietal          | 41                                  | No          | Iso                                             | High                                                         | High                                          | Low                                               | High                                                        | No                               | No                         | No               | No                                                                      | 1.0-2.0                                               | Yes                                                                          | X                                |
| 12      | 35       | Male   | Seizure from prior resection of right temporal lobe AVM | X                   | Left temporoparietal   | 48                                  | No          | Iso                                             | High                                                         | High                                          | Low                                               | High                                                        | No                               | No                         | No               | No                                                                      | 1.0-3.0                                               | No                                                                           | X                                |
| 13      | 50       | Female | Headache                                                | X                   | Left temporoparietal   | 24                                  | No          | Mild hypo                                       | High                                                         | High                                          | Low                                               | High                                                        | No                               | No                         | No               | No                                                                      | 1.0-3.0                                               | No                                                                           | X                                |
| 14      | 47       | Male   | Headache                                                | X                   | Left parietal          | 26                                  | No          | Iso                                             | High                                                         | High                                          | X                                                 | High                                                        | No                               | No                         | No               | No                                                                      | 1.0-3.0                                               | No                                                                           | X                                |
| 15      | 50       | Male   | Asymptomatic long-term follow-up of skin melanoma       | X                   | Right frontal          | 25                                  | No          | Iso                                             | High                                                         | High                                          | Low                                               | High                                                        | No                               | No                         | No               | No                                                                      | 1.0-3.0                                               | No                                                                           | X                                |
| 16      | 46       | Female | Headache                                                | X                   | Left parietal          | 30                                  | No          | Iso                                             | High                                                         | High                                          | Low                                               | High                                                        | No                               | No                         | No               | No                                                                      | 1.0-3.0                                               | No                                                                           | X                                |
| 17      | 32       | Female | Asymptomatic follow-up of right frontal meningioma      | X                   | Left posterior frontal | 24                                  | No          | Iso                                             | High                                                         | High                                          | Low                                               | High                                                        | No                               | No                         | No               | No                                                                      | 1.0-3.0                                               | No                                                                           | X                                |
| 18      | 55       | Male   | Bell palsy                                              | X                   | Left parietal          | 36                                  | No          | Iso                                             | High                                                         | High                                          | Low                                               | High                                                        | No                               | No                         | No               | No                                                                      | 1.0-3.0                                               | No                                                                           | X                                |
| 19      | 35       | Female | Seizures                                                | Generalized slowing | Left temporal          | 24                                  | No          | Iso                                             | High                                                         | High                                          | Low                                               | High                                                        | No                               | No                         | No               | No                                                                      | 1.0-5.0                                               | No                                                                           | X                                |
| 20      | 32       | Female | Headache                                                | X                   | Left parietal          | 24                                  | No          | Mild hypo                                       | High                                                         | High                                          | Low                                               | High                                                        | No                               | No                         | No               | No                                                                      | 1.0-3.0                                               | Yes                                                                          | X                                |
| 21      | 28       | Female | Headache                                                | X                   | Left temporal          | 24                                  | No          | Iso                                             | High                                                         | High                                          | X                                                 | High                                                        | No                               | No                         | No               | No                                                                      | 1.0-3.0                                               | No                                                                           | X                                |
| 22      | 21       | Female | Headache                                                | X                   | Left frontal           | 24                                  | No          | Iso                                             | High                                                         | High                                          | X                                                 | High                                                        | No                               | No                         | No               | No                                                                      | 1.0-3.0                                               | No                                                                           | X                                |
| 23      | 48       | Male   | Post-op follow-up of left temporal glioblastoma         | X                   | Right temporal         | 25                                  | No          | Mild hypo                                       | High                                                         | High                                          | X                                                 | Mild hypo                                                   | No                               | No                         | No               | No                                                                      | 1.0-3.0                                               | Yes                                                                          | X                                |
| 24      | 56       | Male   | Headache                                                | X                   | Left frontal           | 27                                  | No          | Mild hypo                                       | High                                                         | High                                          | X                                                 | High                                                        | No                               | No                         | No               | No                                                                      | 1.0-3.0                                               | No                                                                           | X                                |

Continued on next page

**On-line Table: Continued**

| Pt. No. | Age (yr) | Sex    | Clinical Manifestation                    | EEG                                                           | Location              | Clinical Imaging Stability (mo) | Change during Follow-Up Period | Mass Effect | Signal Intensity on T1WI (Compared with Cortex) | Signal Intensity on T2WI (Compared with Normal White Matter) | Signal Intensity on FLAIR (Compared with CSF) | Signal Intensity on Thin-Section T2WI (Compared with CSF) | Signal Intensity on DWI (Compared with Normal White Matter) | Evidence of Restricted Diffusion | Presence of Gd Enhancement | SWI/GRE Blooming | Presence of Cortical Malformations or Abnormally Thick Overlying Cortex | Bubble-Like Lesion Size (Average Size in Millimeters) | Presence of Abnormal White Matter Signal Surrounding the Bubble-Like Lesions | Pathology Result                                                                                                                |
|---------|----------|--------|-------------------------------------------|---------------------------------------------------------------|-----------------------|---------------------------------|--------------------------------|-------------|-------------------------------------------------|--------------------------------------------------------------|-----------------------------------------------|-----------------------------------------------------------|-------------------------------------------------------------|----------------------------------|----------------------------|------------------|-------------------------------------------------------------------------|-------------------------------------------------------|------------------------------------------------------------------------------|---------------------------------------------------------------------------------------------------------------------------------|
| 25      | 46       | Male   | Transient episode of expressive dysphasia | X                                                             | Left temporo-parietal | 54                              | No                             | No          | Hypo                                            | High                                                         | High                                          | X                                                         | X                                                           | X                                | Yes                        | No               | No                                                                      | 1.0–3.0                                               | Yes                                                                          | X                                                                                                                               |
| 26      | 25       | Male   | Isolated seizure                          | Frequent spikes of slow discharges in the right temporal lobe | Right temporal        | 96                              | No                             | No          | Hypo                                            | High                                                         | High                                          | X                                                         | X                                                           | X                                | No                         | No               | No                                                                      | 1.0–3.0                                               | Yes                                                                          | Two small areas of abnormal tissue consisting of glial and neuronal cells in a rarified background of focal microcyst formation |
| 27      | 48       | Female | Headache                                  | X                                                             | Right occipital       | 24                              | No                             | No          | Iso                                             | High                                                         | High                                          | X                                                         | X                                                           | X                                | No                         | No               | No                                                                      | 1.0–3.0                                               | Yes                                                                          | X                                                                                                                               |
| 28      | 27       | Female | Seizures                                  | X                                                             | Left precentral gyrus | 144                             | No                             | No          | Hypo                                            | High                                                         | High                                          | X                                                         | X                                                           | X                                | No                         | No               | No                                                                      | 1.0–3.0                                               | Yes                                                                          | X                                                                                                                               |
| 29      | 41       | Female | Headache                                  | X                                                             | Right frontal         | 25                              | No                             | No          | Iso                                             | High                                                         | High                                          | X                                                         | High                                                        | No                               | No                         | No               | No                                                                      | 1.0–3.0                                               | Yes                                                                          | X                                                                                                                               |
| 30      | 51       | Female | Headache                                  | X                                                             | Right parietal        | 26                              | No                             | No          | Iso                                             | High                                                         | High                                          | Low                                                       | High                                                        | No                               | No                         | No               | No                                                                      | 1.0–3.0                                               | No                                                                           | X                                                                                                                               |
| 31      | 53       | Male   | Seizures (mesial temporal lobe sclerosis) | Left temporal lobe                                            | Left temporal         | X                               | No                             | No          | Hypo                                            | High                                                         | High                                          | X                                                         | X                                                           | No                               | No                         | No               | No                                                                      | 1.0–3.0                                               | Yes                                                                          | Consistent with multinodular vacuulating tumor                                                                                  |
| 32      | 28       | Female | Headache                                  | X                                                             | Left temporal         | 25                              | No                             | No          | Iso                                             | High                                                         | High                                          | Low                                                       | High                                                        | No                               | No                         | No               | No                                                                      | 1.0–3.0                                               | No                                                                           | X                                                                                                                               |
| 33      | 43       | Male   | Headache                                  | X                                                             | Left frontal          | X                               | No                             | No          | Mild hypo                                       | High                                                         | High                                          | X                                                         | X                                                           | No                               | No                         | No               | No                                                                      | 1.0–3.0                                               | Yes                                                                          | Consistent with multinodular vacuulating tumor                                                                                  |

**Note:**—EEG indicates electroencephalography; Gd, gadolinium; GRE, gradient recalled-echo; Iso, isointense; X, not available; hypo, hypointense; Pt., patient; Post-op., postoperative.
